# Supplementary material
Source: publisher site journal article supplement (https://www.dovepress.com/article/433430)
Supplement: Supplementary file 1 [file get_supplementary_file.php]

Supplementary Material

## Supplementary Figures

**
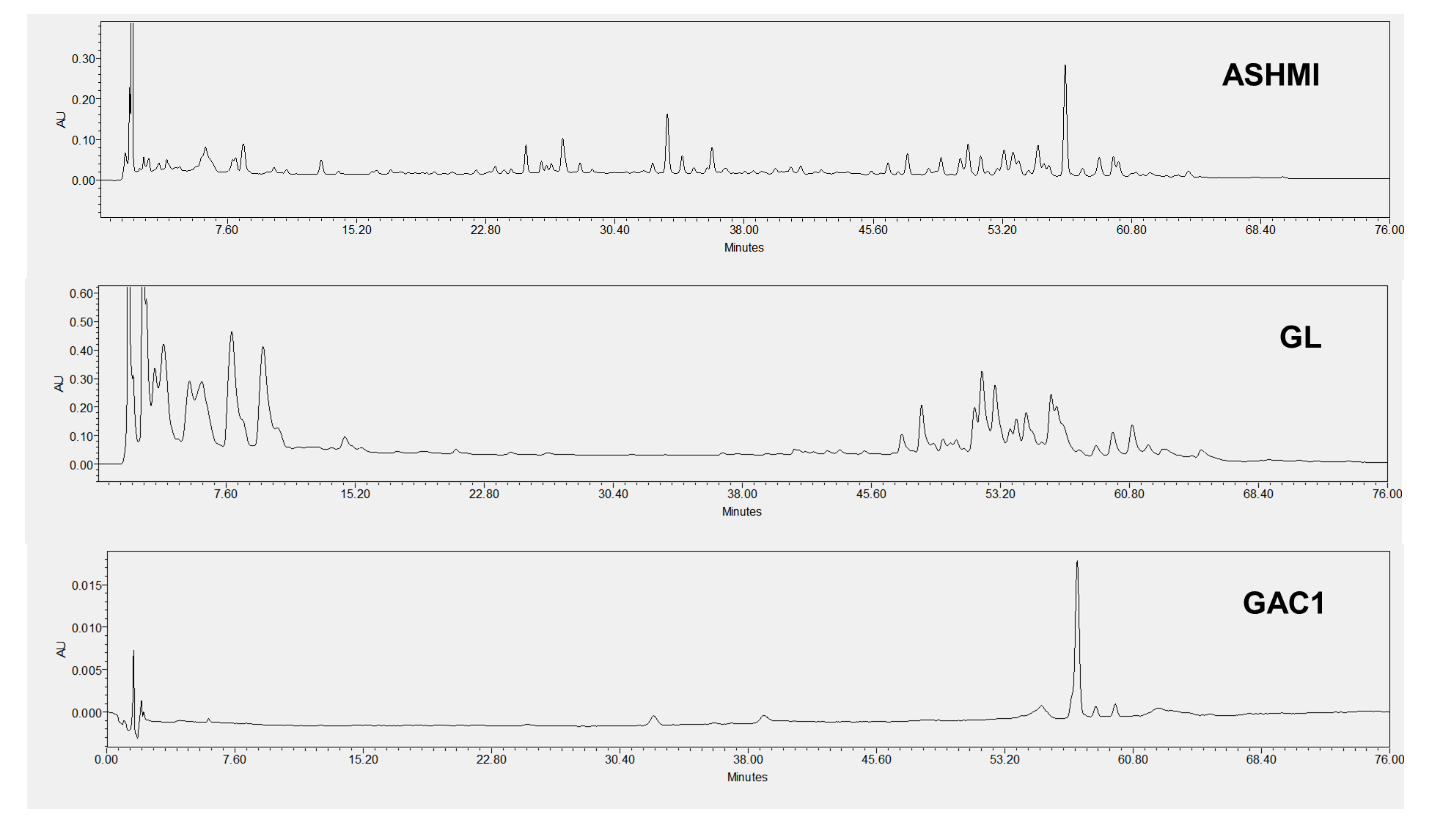
**

**Supplementary E-Figure 1.** HPLC fingerprint of ASHMI, *Ganoderma Lucidum* (GL) and GAC1.
